# Supplementary material for: Effects of Carbon Ion Beam-induced Mutagenesis for the Screening of RED Production-deficient Mutants of Streptomyces Coelicolor JCM4020
Source: Research Square preprint supplement (doi:10.21203/rs.3.rs-1194810/v1), 2022-01-27
Supplement: Supplementary file 1 [file 792e9e2a0ce85c8c23c3e9c3.docx]

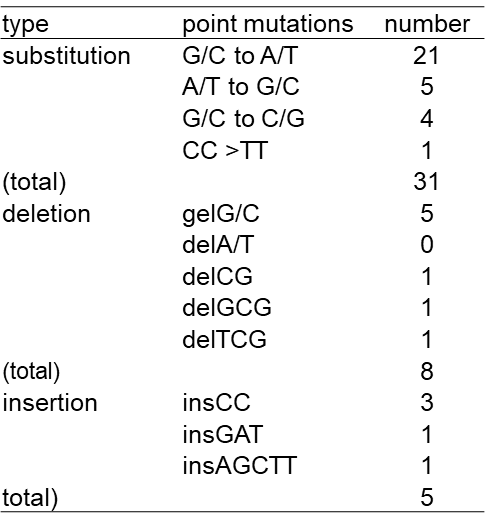
**Table 3.** Type of point mutations found in the RED deficient mutants of *S. coelicolor* JCM4020 by carbon ion irradiation.
