# Supplementary material for: Effects of Carbon Ion Beam-induced Mutagenesis for the Screening of RED Production-deficient Mutants of Streptomyces Coelicolor JCM4020
Source: Research Square preprint supplement (doi:10.21203/rs.3.rs-1194810/v1), 2022-01-27
Supplement: Supplementary file 3 [file e5d37657faf646c5207ae67a.docx]

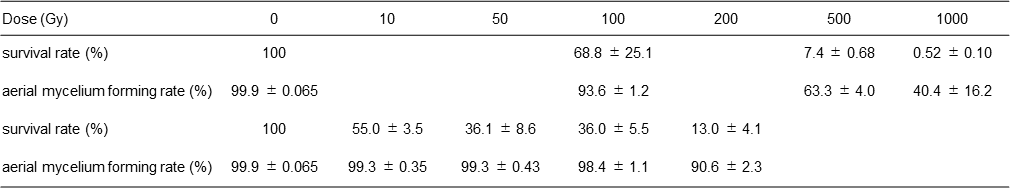
**Table 1.** Survival rates and aerial mycelium forming rate of the carbon ion irradiated spores of *Streptomyces coelicolor* JCM4020.
