# Supplementary material for: Effects of Carbon Ion Beam-induced Mutagenesis for the Screening of RED Production-deficient Mutants of Streptomyces Coelicolor JCM4020
Source: Research Square preprint supplement (doi:10.21203/rs.3.rs-1194810/v1), 2022-01-27
Supplement: Supplementary file 4 [file 605fadb54333bb5580480c2c.docx]

**Supplemental data**

**Title:**

Effects of carbon ion beam-induced mutagenesis for the screening of RED production-deficient mutants of *Streptomyces coelicolor* JCM4020

**Authors:**

Masaomi Yanagisawa†a, Shumpei Asamizu†*a,b, Katsuya Satohc, Yutaka Oonoc, Hiroyasu Onaka*a,b

**Affiliations:**

aGraduate School of Agricultural and Life Sciences, The University of Tokyo, 1-1-1

Yayoi, Bunkyo, Tokyo, Japan

bCollaborative Research Institute for Innovative Microbiology (CRIIM), The University of Tokyo, 1-1-1 Yayoi, Bunkyo, Tokyo 113-8657, Japan

cDepartment of Radiation-Applied Biology Research, Takasaki Advanced Radiation Research Institute, Quantum Beam Science Research Directorate, National Institutes for Quantum Science and Technology, Takasaki, Gunma, Japan

†These authors contributed equally to this work.

***Corresponding authors:**

Shumpei Asamizu: asamizu@g.ecc.u-tokyo.ac.jp

Hiroyasu Onaka: aonaka@g.ecc.u-tokyo.ac.jp

**Contents of supplemental data**

**Supplemental Table 1.** Result of antiSMASH (ver. 6.0.1) for prediction of secondary metabolite biosynthetic gene cluster in the *Streptomyces coelicolor* JCM4020.

**Supplemental figure 1.**

Summary of method to screen RED deficient mutants of *S. coelicolor* JSM4020 (First screening method).

**Supplemental figure 2.**

Summary of method to screen RED deficient mutants of *S. coelicolor* JSM4020 (Second screening method).

**Supplemental figure 3_1-5.**

Phenotype of the mutants.

**Supplemental figure 4.**

Mutation caused frameshift in GltB and indicated to inactivate the function.

**Supplemental figure 5.**

Mutation caused frameshift in FusA and indicated to inactivate the function.

**Supplemental figure 6.**

Complementation of *gltB* (*sco2026*) gene in the Mt 108013 restore the production of RED.

**Supplemental figure 7.**

Complementation of *fusA* (*sco4661*) gene in the Mt 203010 restore the production of RED.

**Supplemental Table 2.** Primer sequences used in this study.

**Supplemental Table 1.** Result of antiSMASH (ver. 6.0.1) for prediction of secondary metabolite biosynthetic gene cluster in the *Streptomyces coelicolor* JCM4020.

| Region | Type | From | To | Most similar known cluster |  | Similarity |
| --- | --- | --- | --- | --- | --- | --- |
| Region 1 | hglE-KS,T1PKS | 71,407 | 124,413 | leinamycin | NRP + Polyketide:Modular type I + Polyketide:Trans-AT type I | 2% |
| Region 2 | terpene | 161,627 | 186,108 | isorenieratene | Terpene | 100% |
| Region 3 | lanthipeptide-class-i | 246,919 | 270,450 |  |  |  |
| Region 4 | NRPS | 477,557 | 527,471 | coelichelin | NRP | 100% |
| Region 5 | RiPP-like | 774,865 | 783,131 | informatipeptin | RiPP:Lanthipeptide | 42% |
| Region 6 | lanthipeptide-class-i | 1,044,545 | 1,069,733 |  |  |  |
| Region 7 | T3PKS | 1,382,895 | 1,421,712 | herboxidiene | Polyketide | 8% |
| Region 8 | ectoine | 2,121,065 | 2,131,463 | ectoine | Other | 100% |
| Region 9 | melanin | 3,096,622 | 3,107,191 | istamycin | Saccharide | 4% |
| Region 10 | siderophore | 3,191,637 | 3,202,807 | desferrioxamin B / desferrioxamine E | Other | 83% |
| Region 11 | NRPS | 3,691,637 | 3,770,751 | CDA1b / CDA2a / CDA2b / CDA3a / CDA3b / CDA4a / CDA4b | NRP:Ca+-dependent lipopeptide | 87% |
| Region 12 | T2PKS | 5,572,997 | 5,643,749 | actinorhodin | Polyketide:Type II | 100% |
| Region 13 | terpene | 5,747,286 | 5,767,846 | albaflavenone | Terpene | 100% |
| Region 14 | T2PKS | 5,827,242 | 5,899,784 | spore pigment | Polyketide | 66% |
| Region 15 | siderophore | 6,386,090 | 6,396,425 |  |  |  |
| Region 16 | T1PKS,NRPS-like,prodigiosin | 6,479,428 | 6,526,198 | undecylprodigiosin | NRP + Polyketide | 100% |
| Region 17 | RiPP-like | 6,769,891 | 6,781,207 |  |  |  |
| Region 18 | terpene | 6,793,711 | 6,813,180 | geosmin | Terpene | 100% |
| Region 19 | siderophore | 6,979,324 | 6,992,543 | enduracidin | NRP | 6% |
| Region 20 | T1PKS,butyrolactone | 7,017,911 | 7,088,990 | coelimycin P1 | Polyketide:Modular type I | 100% |
| Region 21 | thioamide-NRP,NRPS | 7,220,287 | 7,274,470 | nogalamycin | Polyketide | 40% |
| Region 22 | lanthipeptide-class-iii | 7,532,377 | 7,555,091 | SapB | RiPP:Lanthipeptide | 100% |
| Region 23 | terpene | 7,628,374 | 7,654,201 | hopene | Terpene | 100% |
| Region 24 | other,T3PKS | 7,947,407 | 8,022,409 | germicidin | Other | 100% |
| Region 25 | indole | 8,244,084 | 8,265,211 | 5-isoprenylindole-3-carboxylate β-D-glycosyl ester | Other | 28% |
| Region 26 | T3PKS,NRPS,terpene | 8,451,394 | 8,524,513 | coelibactin | NRP | 100% |


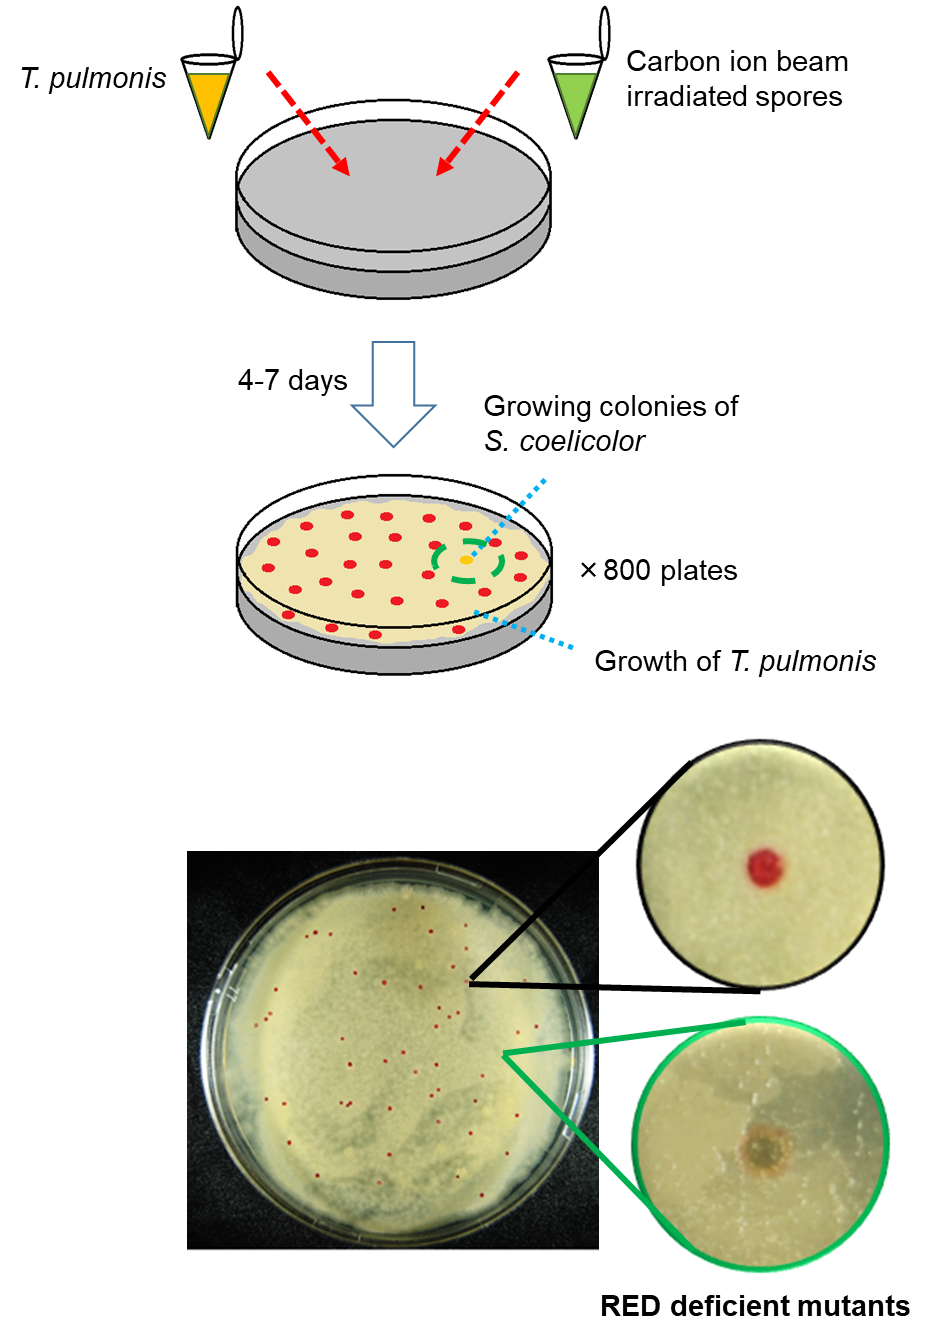


**Supplemental figure 1.**

Summary of method to screen RED deficient mutants of *S. coelicolor* JSM4020 (First screening method). Details are described in Material and methods.


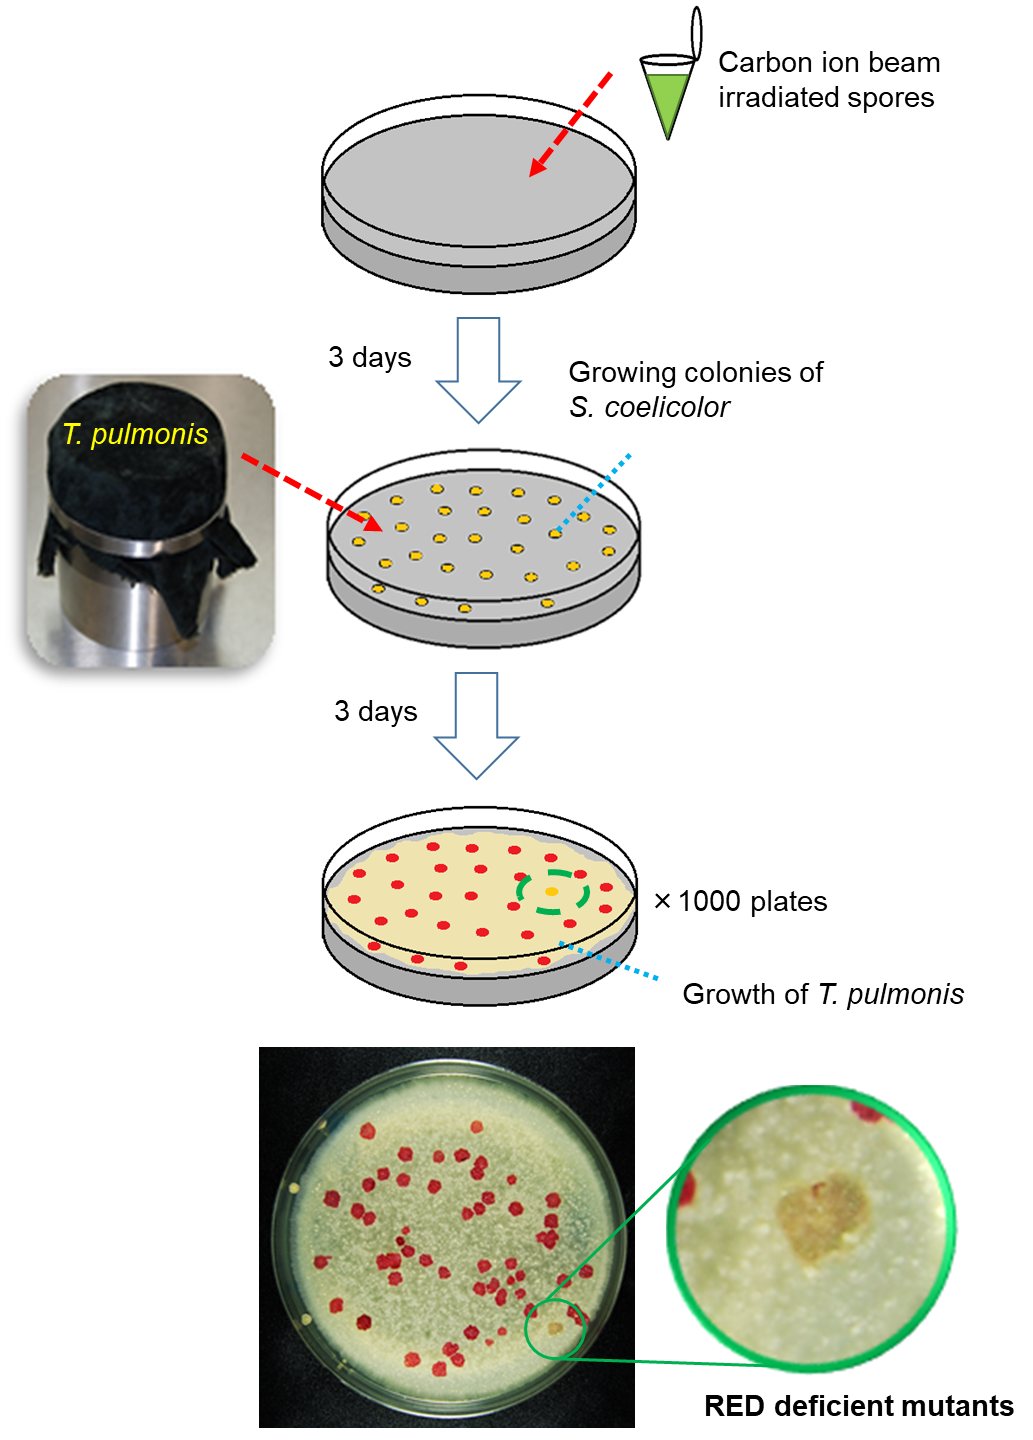


**Supplemental figure 2.**

Summary of method to screen RED deficient mutants of *S. coelicolor* JSM4020 (Second screening method). Details are described in Material and methods.

**
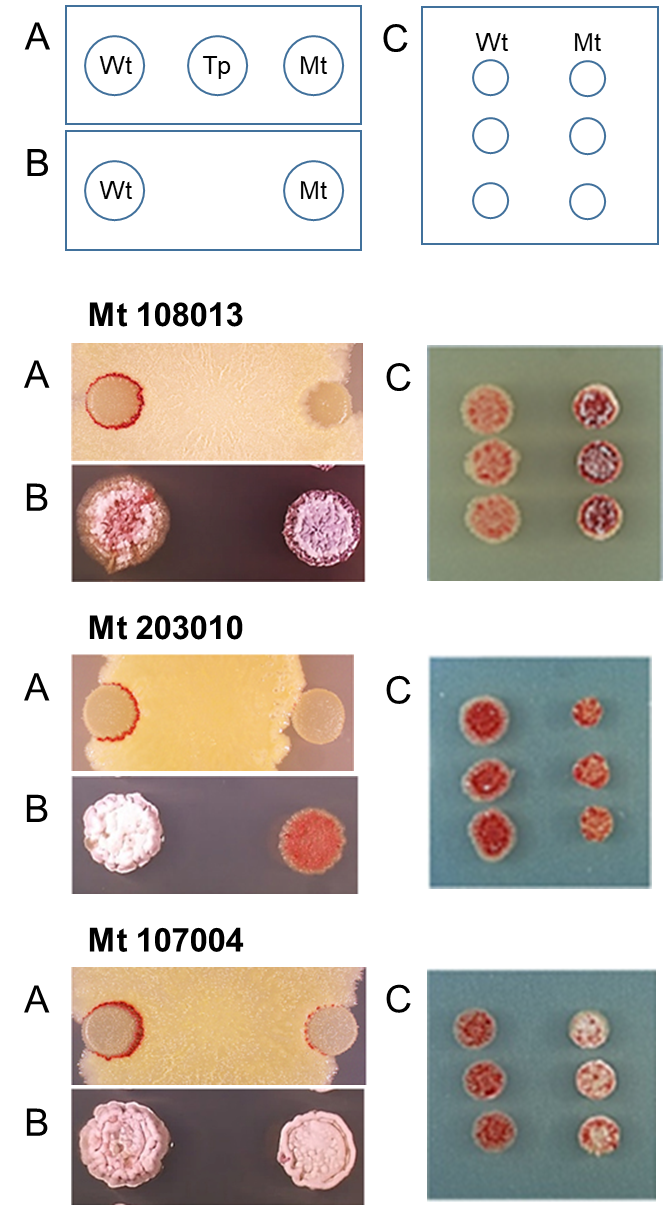
Supplemental figure 3_1.**

Phenotype of the mutants. A: dual culture of strain JCM4020 wild type (Wt) or respective Mutant (Mt) with *Tsukamurella pulmonis* (Tp) grown on YGGS medium, day 5th. B: Wt and Mt grown on Bennett’s maltose, day 11th. C: Wt and Mt grown on Bennett’s maltose+1% NaCl, day 6th.


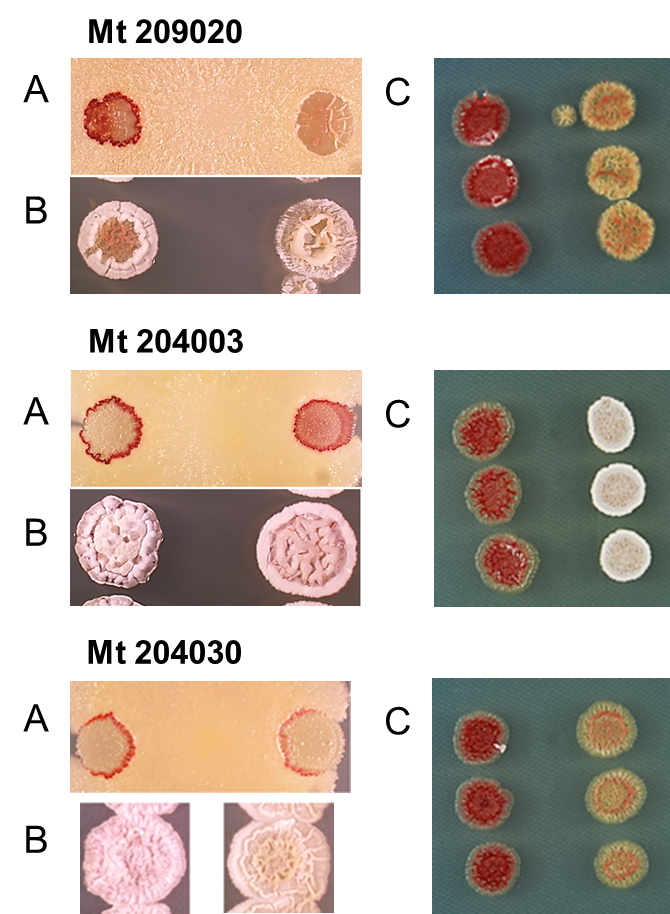
**Supplemental figure 3_2.**

Phenotype of the mutants. A: dual culture of strain JCM4020 wild type (Wt) or respective Mutant (Mt) with *Tsukamurella pulmonis* (Tp) grown on YGGS medium, day 5th. B: Wt and Mt grown on Bennett’s maltose, day 11th. C: Wt and Mt grown on Bennett’s maltose+1% NaCl, day 6th.


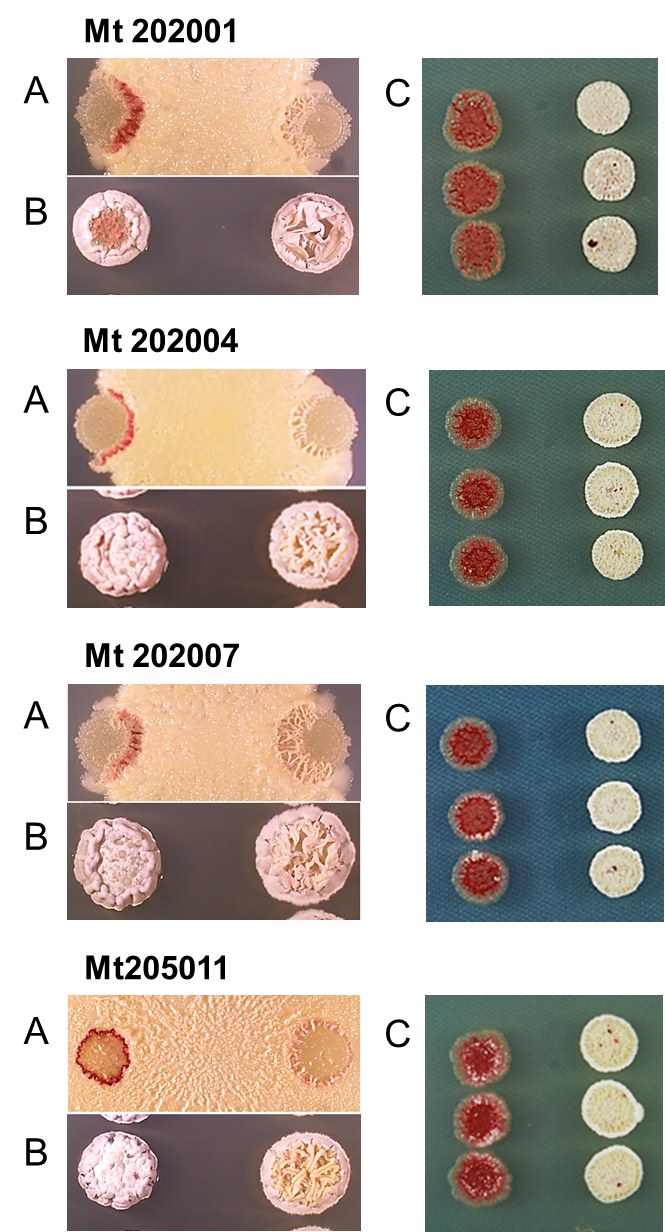
**Supplemental figure 3_3.**

Phenotype of the mutants. A: dual culture of strain JCM4020 wild type (Wt) or respective Mutant (Mt) with *Tsukamurella pulmonis* (Tp) grown on YGGS medium, day 5th. B: Wt and Mt grown on Bennett’s maltose, day 11th. C: Wt and Mt grown on Bennett’s maltose+1% NaCl, day 6th.


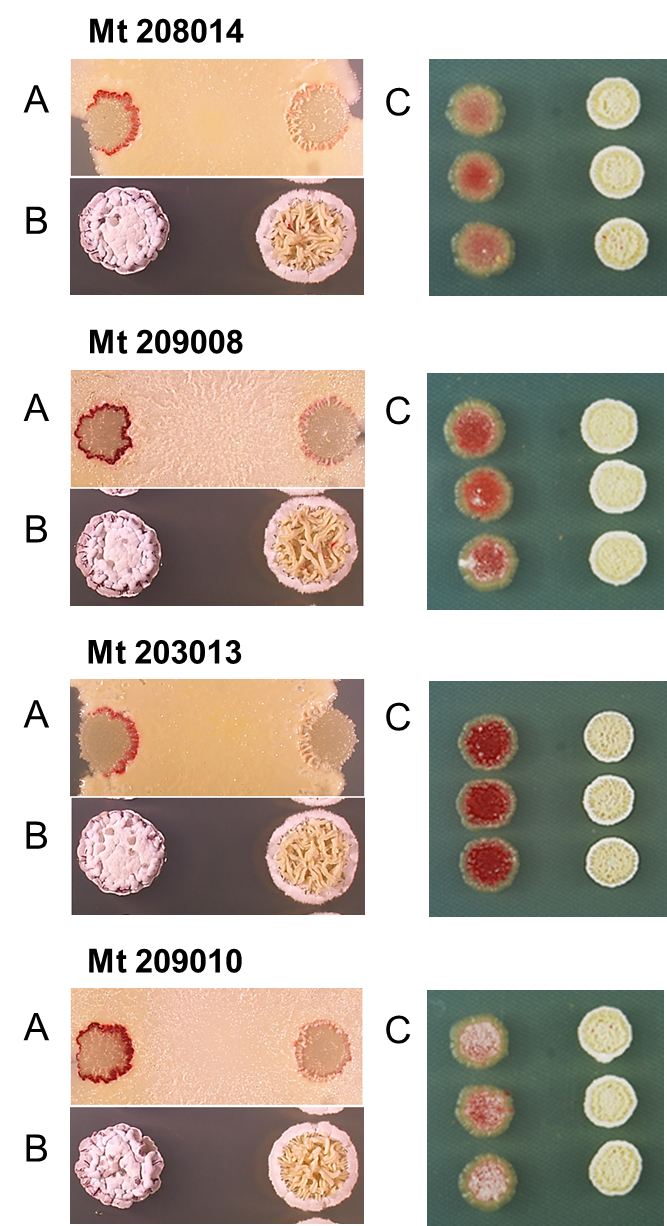
**Supplemental figure 3_4.**

Phenotype of the mutants. A: dual culture of strain JCM4020 wild type (Wt) or respective Mutant (Mt) with *Tsukamurella pulmonis* (Tp) grown on YGGS medium, day 5th. B: Wt and Mt grown on Bennett’s maltose, day 11th. C: Wt and Mt grown on Bennett’s maltose+1% NaCl, day 6th.


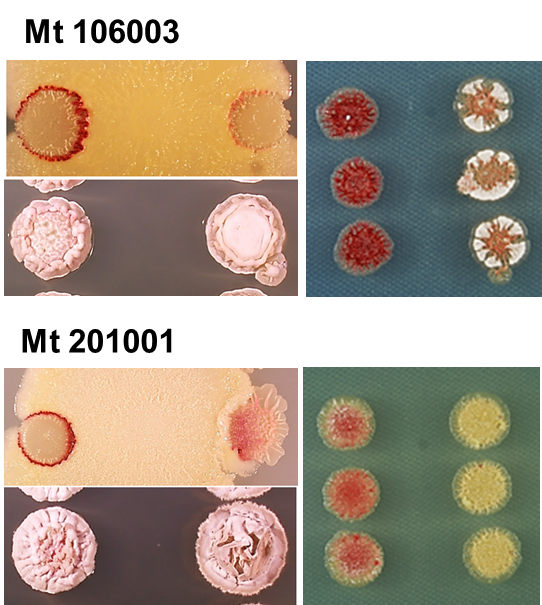
**Supplemental figure 3_5.**

Phenotype of the mutants. A: dual culture of strain JCM4020 wild type (Wt) or respective Mutant (Mt) with *Tsukamurella pulmonis* (Tp) grown on YGGS medium, day 5th. B: Wt and Mt grown on Bennett’s maltose, day 11th. C: Wt and Mt grown on Bennett’s maltose+1% NaCl, day 6th.


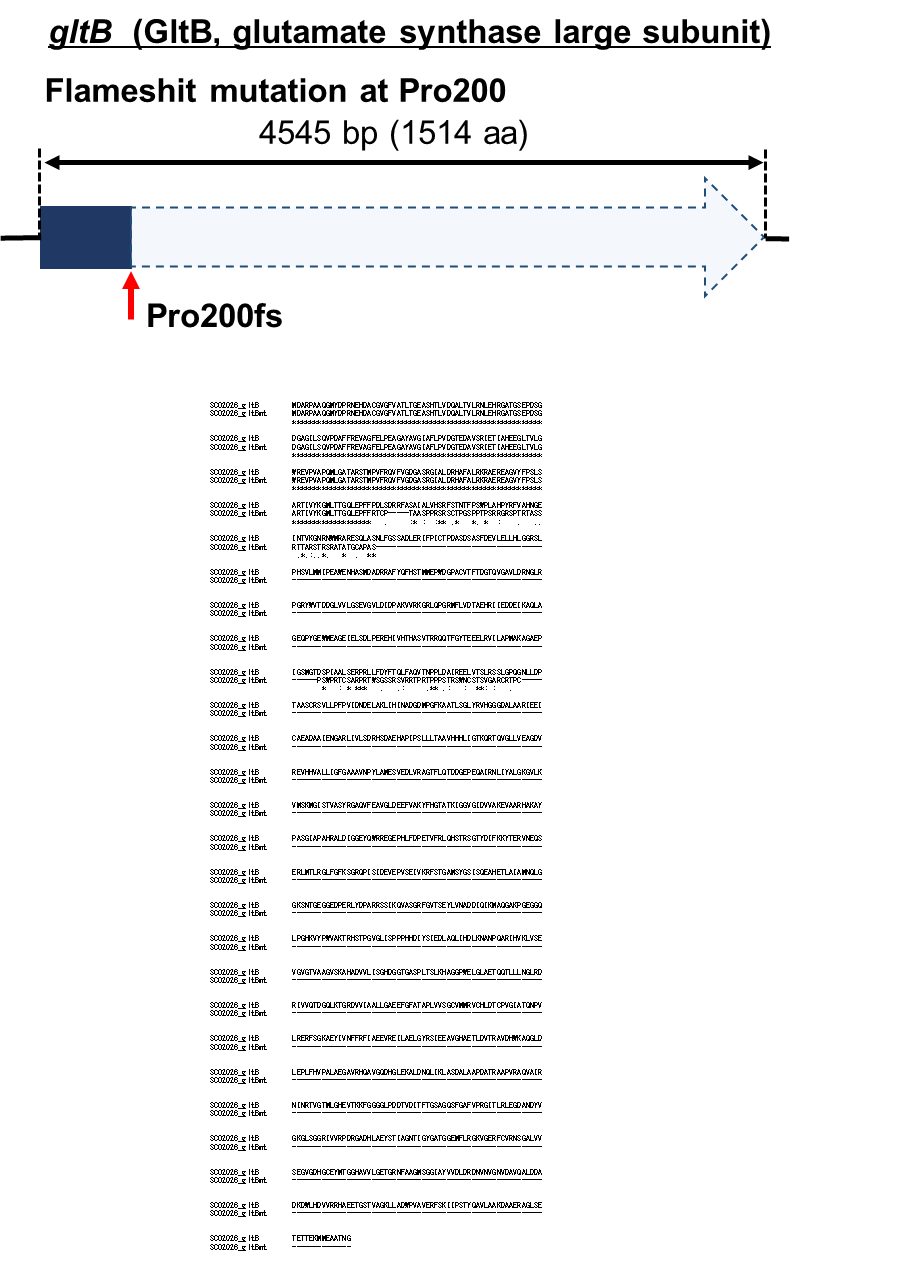


**Supplemental figure 4.**

Mutation caused frameshift in GltB and indicated to inactivate the function


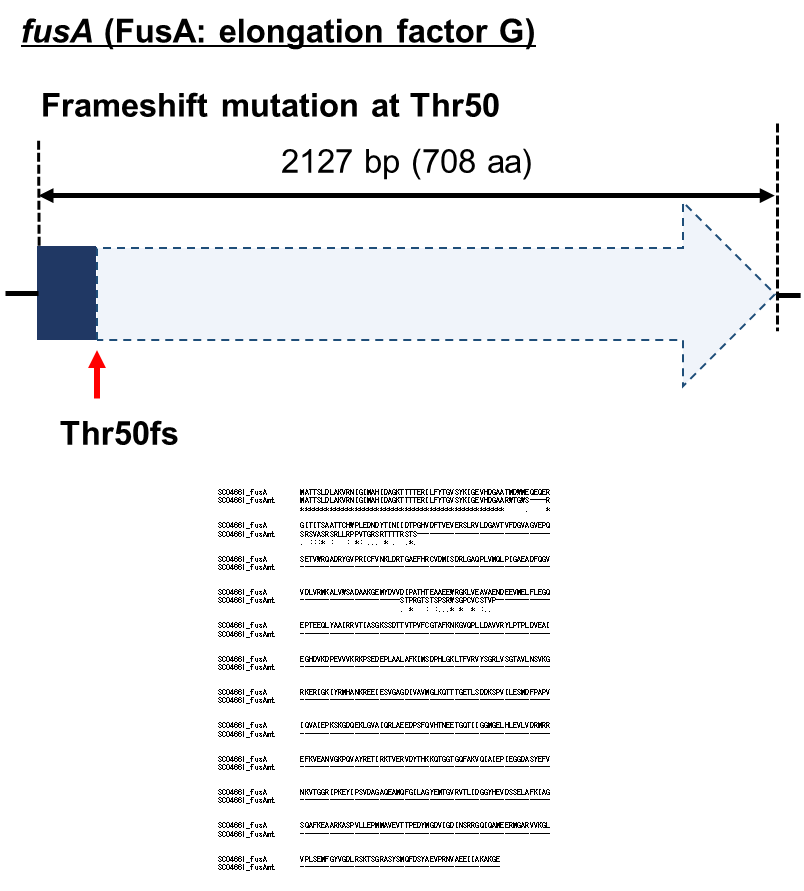


**Supplemental figure 5.**

Mutation caused frameshift in FusA and indicated to inactivate the function.


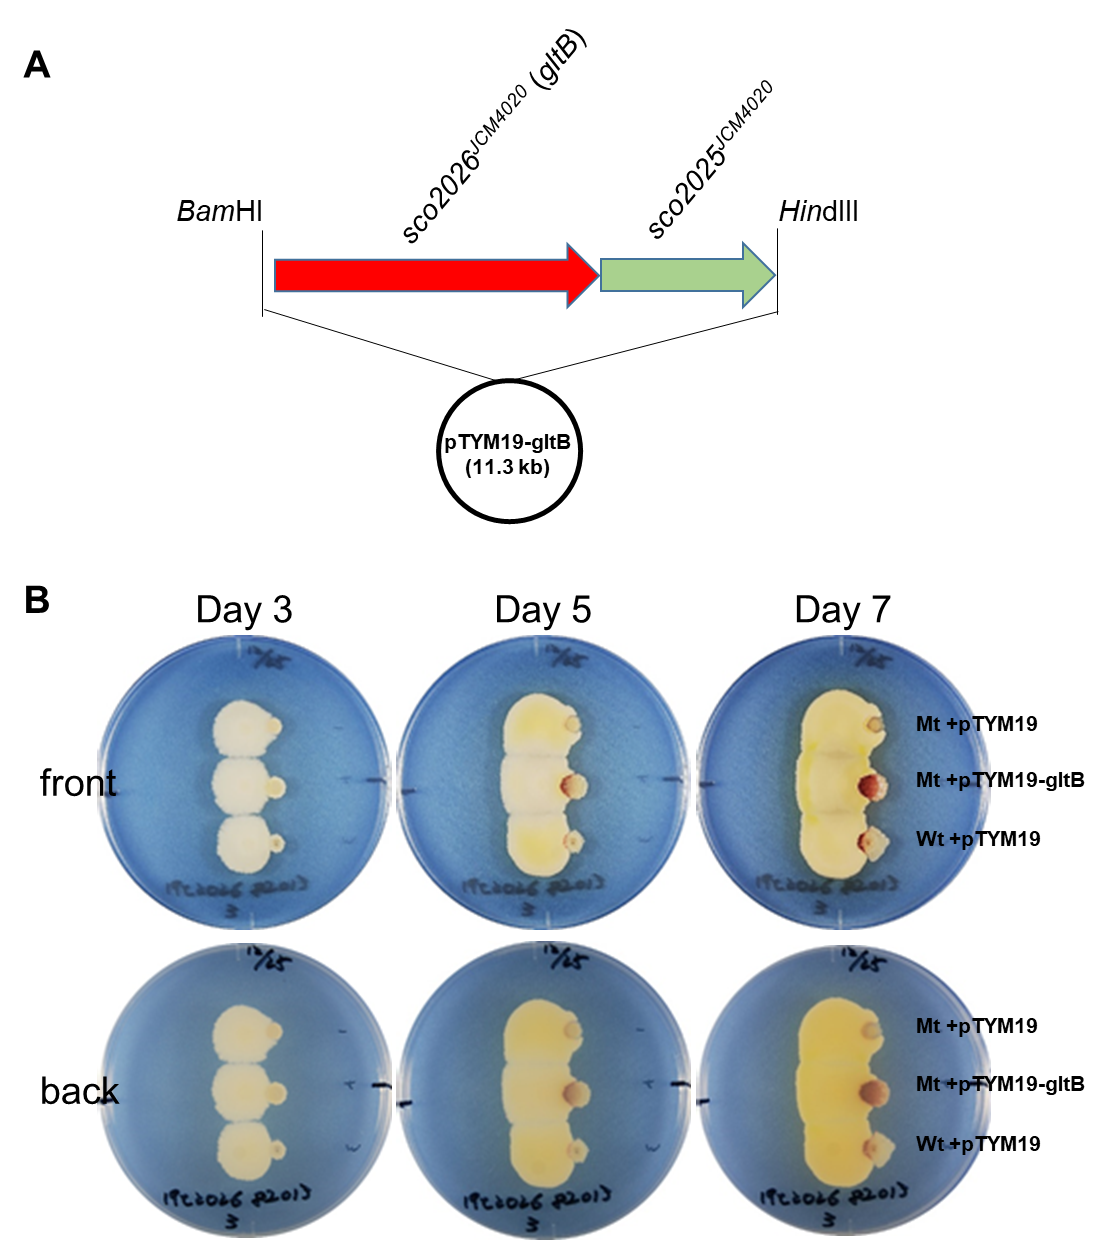


**Supplemental figure 6.**

Complementation of *gltB* (*sco2026*) gene in the Mt 108013 restore the production of RED.


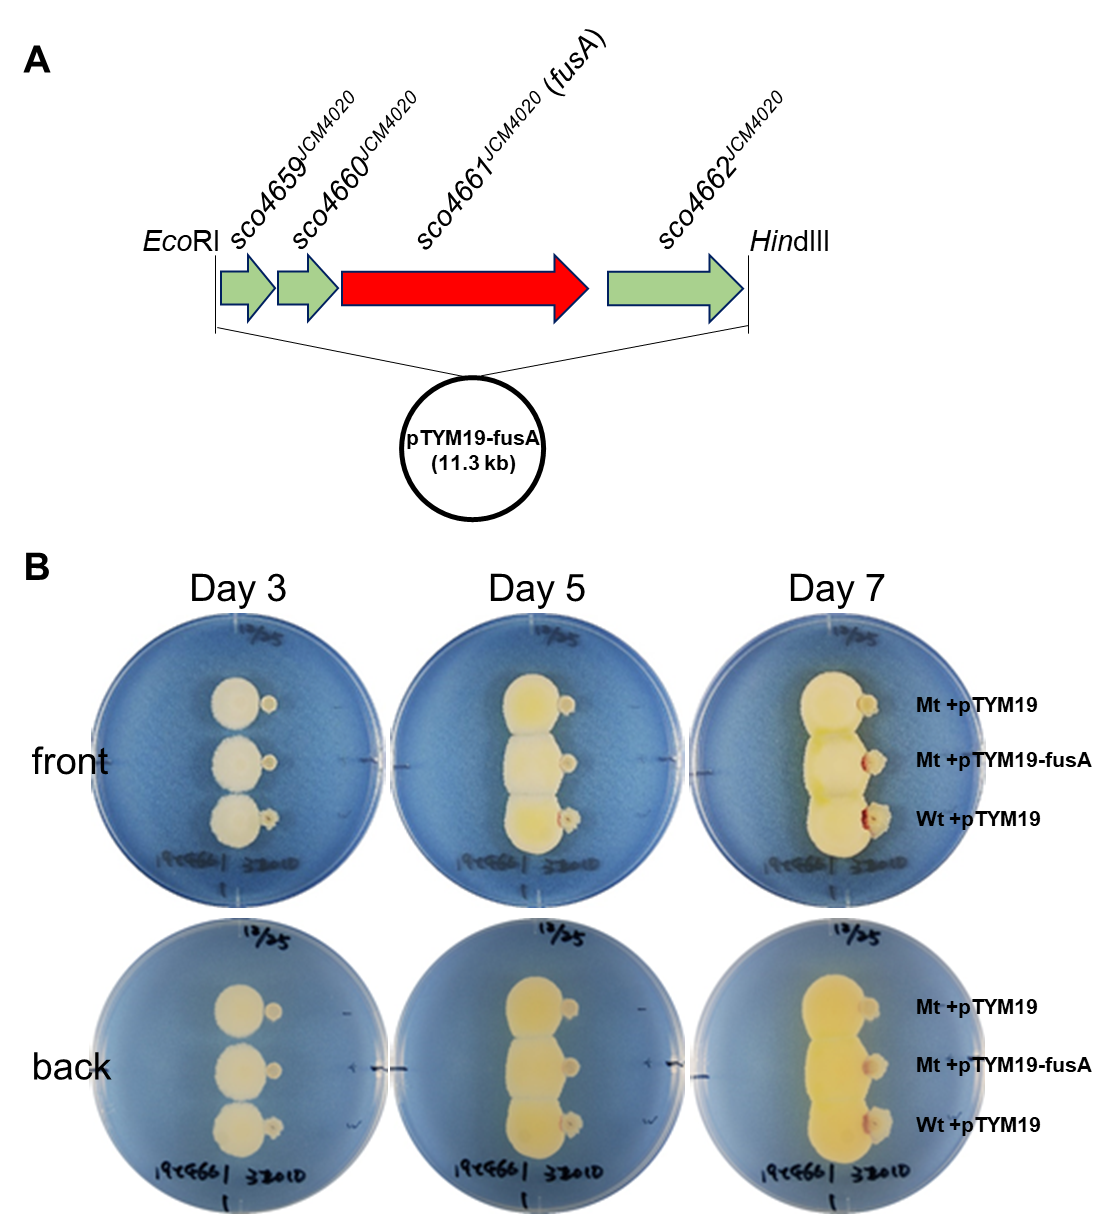


**Supplemental figure 7.**

Complementation of *fusA* (*sco4661*) gene in the Mt 203010 restore the production of RED.

**Supplemental Table 2.** Primer sequences used in this study.

| primer name | sequence |
| --- | --- |
| gltB (sco2026-25)-for | ccgtggatccgtccggctcgaacttatgcg |
| gltB (sco2026-25)-rev | gtccaagctttcagaccgcgagggcgc |
| fusA (sco4659-62)-for | agtgaattcgagcgggcggcgatg |
| fusA (sco4659-62)-rev | aagaagcttttacttgttgatcttggtgacctggc |

Note: underline indicate the restriction enzyme recognition site.
