# Supplementary material for: Effects of Carbon Ion Beam-induced Mutagenesis for the Screening of RED Production-deficient Mutants of Streptomyces Coelicolor JCM4020
Source: Research Square preprint supplement (doi:10.21203/rs.3.rs-1194810/v1), 2022-01-27
Supplement: Supplementary file 5 [file aebc11f1d2f72aac6f9f1c9a.docx]

**Table 2.** Point mutations found in the RED production-deficient mutants of *S. coelicolor* JCM4020.

Note: No.1-3: Mutants which produced RED in salt containing medium. No. 7-14: Mutants containing a point mutation in *sarA* gene. No. 15-16: Mutants containing a point mutation in RED biosynthetic gene. Abbreviations in category of mutation; M: amino acid substitution; F: flame shift mutation; N: nonsense mutation; S: silent mutation; I: insertion of amino acid; D: deletion of amino acid. Identities (%): Amino acid sequence identities between CDS from strain JCM4020 and strain A3(2) M145.
